# Supplementary material for: Evidence for a bimodal distribution of hybrid indices in a hybrid zone with high admixture
Source: PubMed Central journal article supplement (PMC4807441; doi:10.1098/rsos.150285), 2015-12-09
Supplement: rsos150285supp1.pdf [file rsos150285supp1.pdf]

S1 Figure. Frequency of each allele present (y-axis) in each population (y-axis) for each locus.





### FhATG6

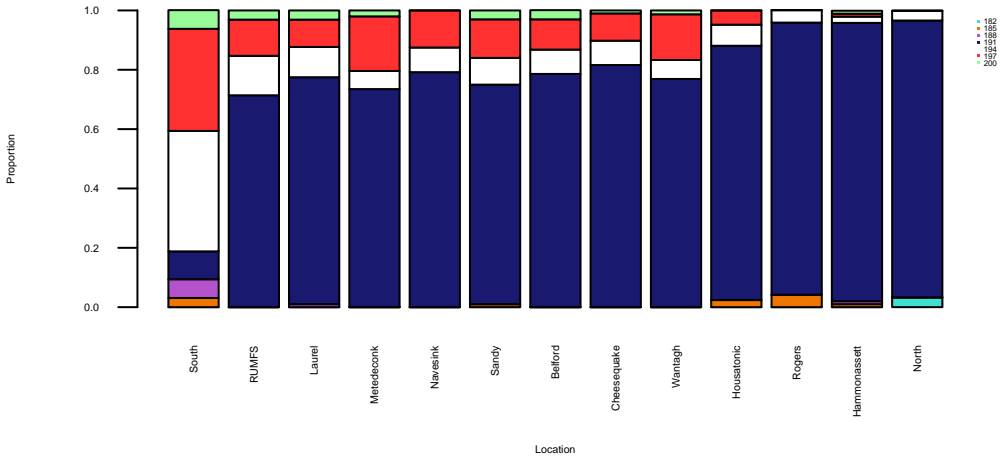

### FhATG17

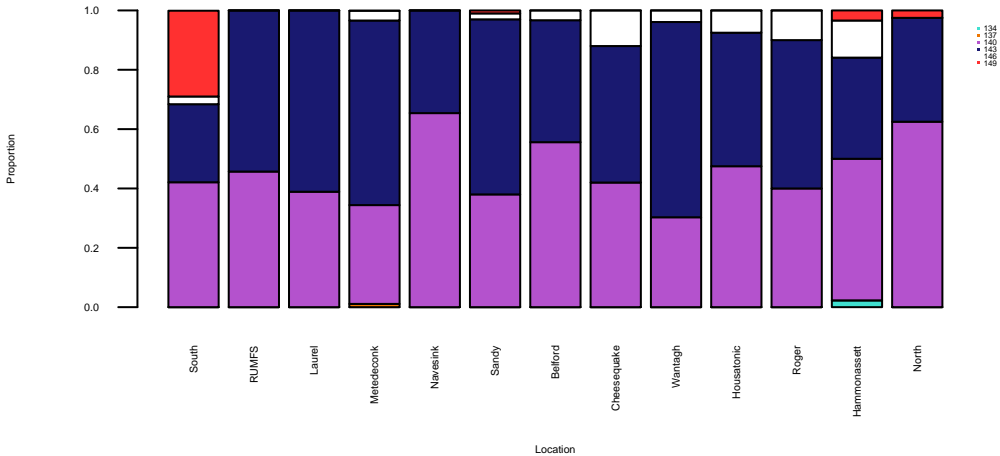

### FhATG18

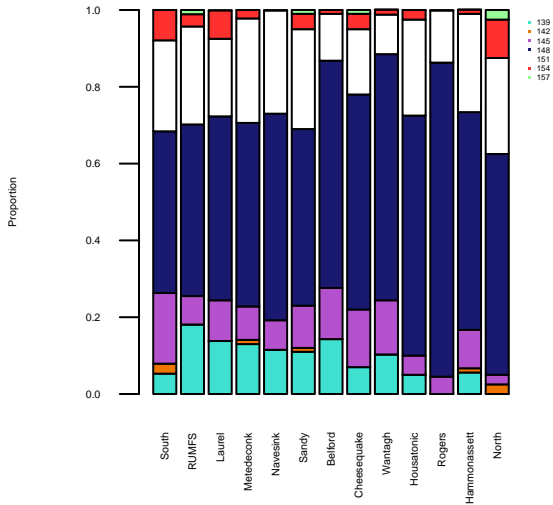



### FhATGB101

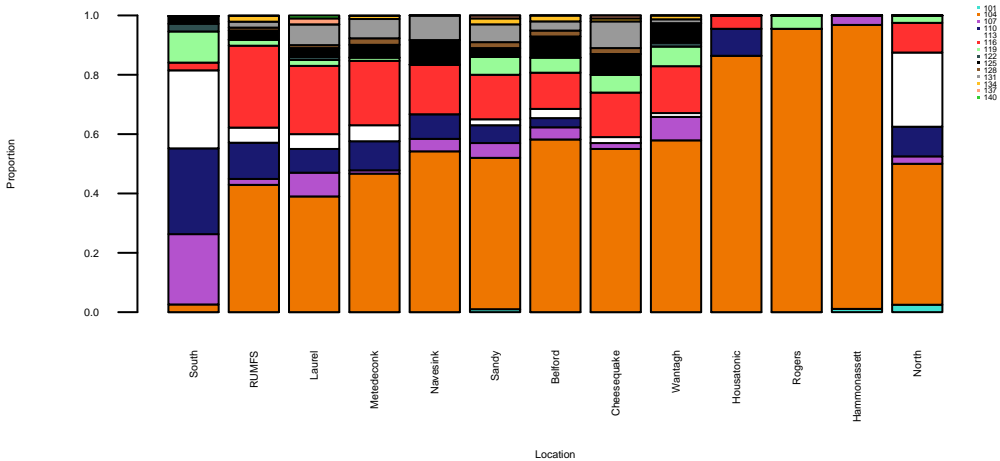







S2 Figure. Harvester analysis of *structure* output showing support for k=2 clusters.

L(K) (mean  $\pm$  SD)

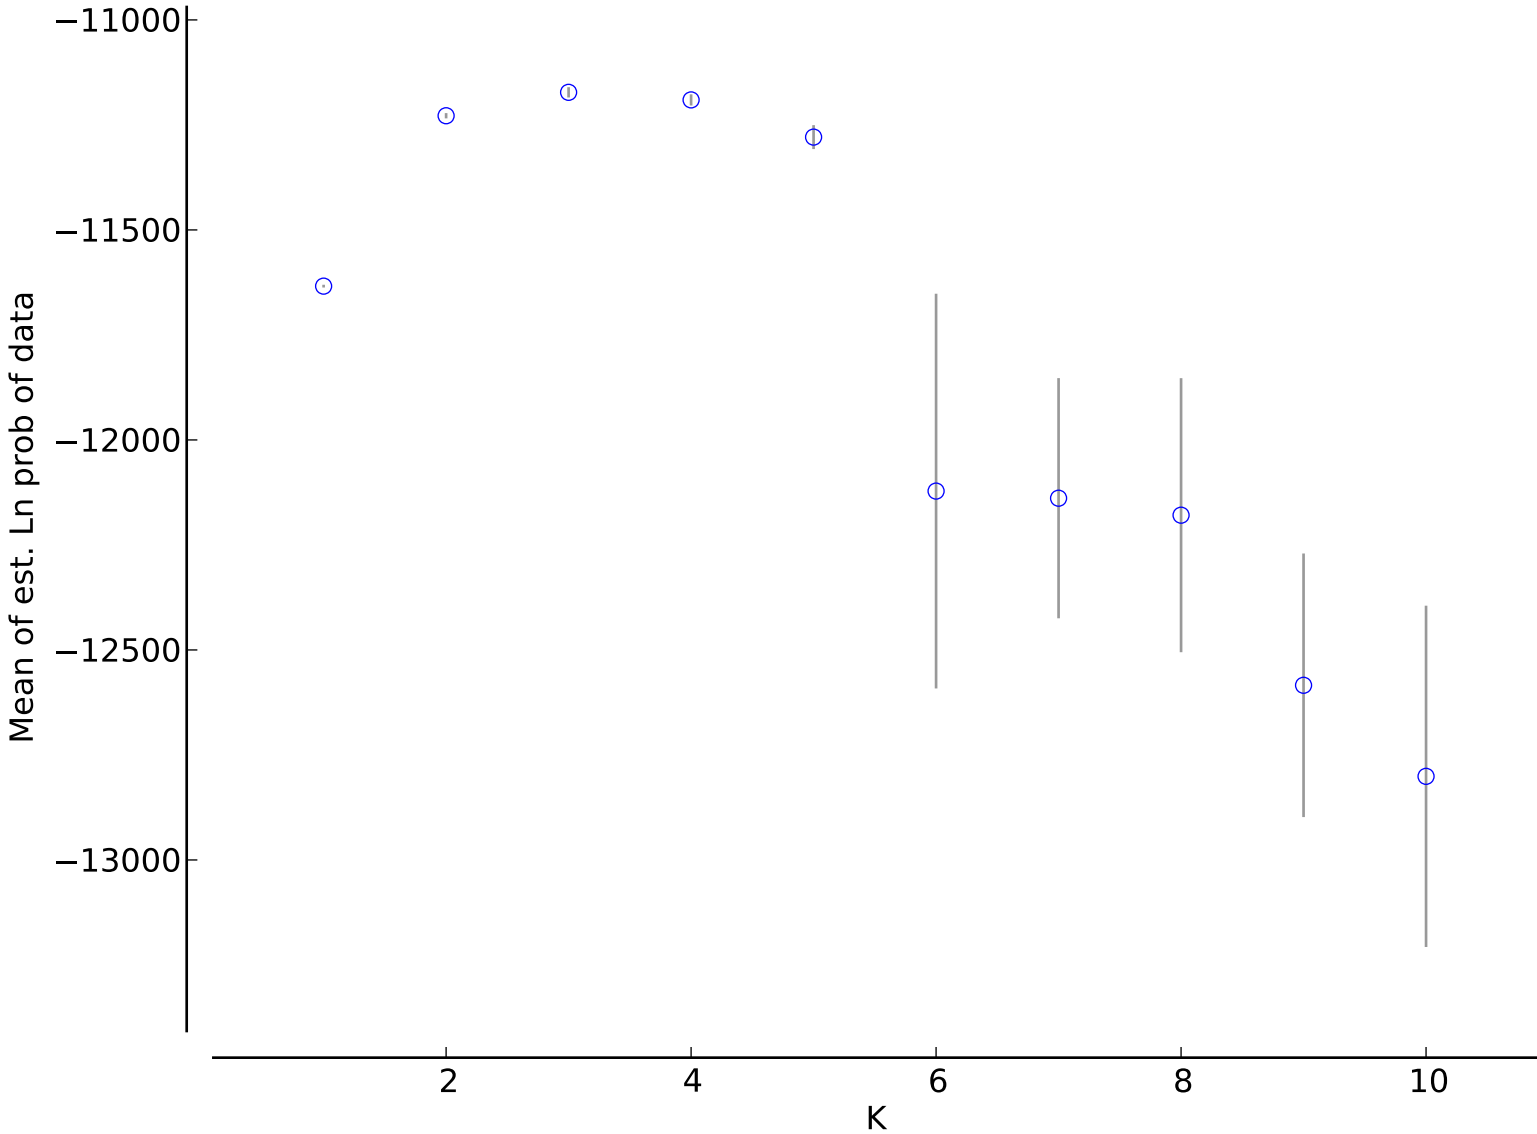

Rate of change of the likelihood distribution (mean)

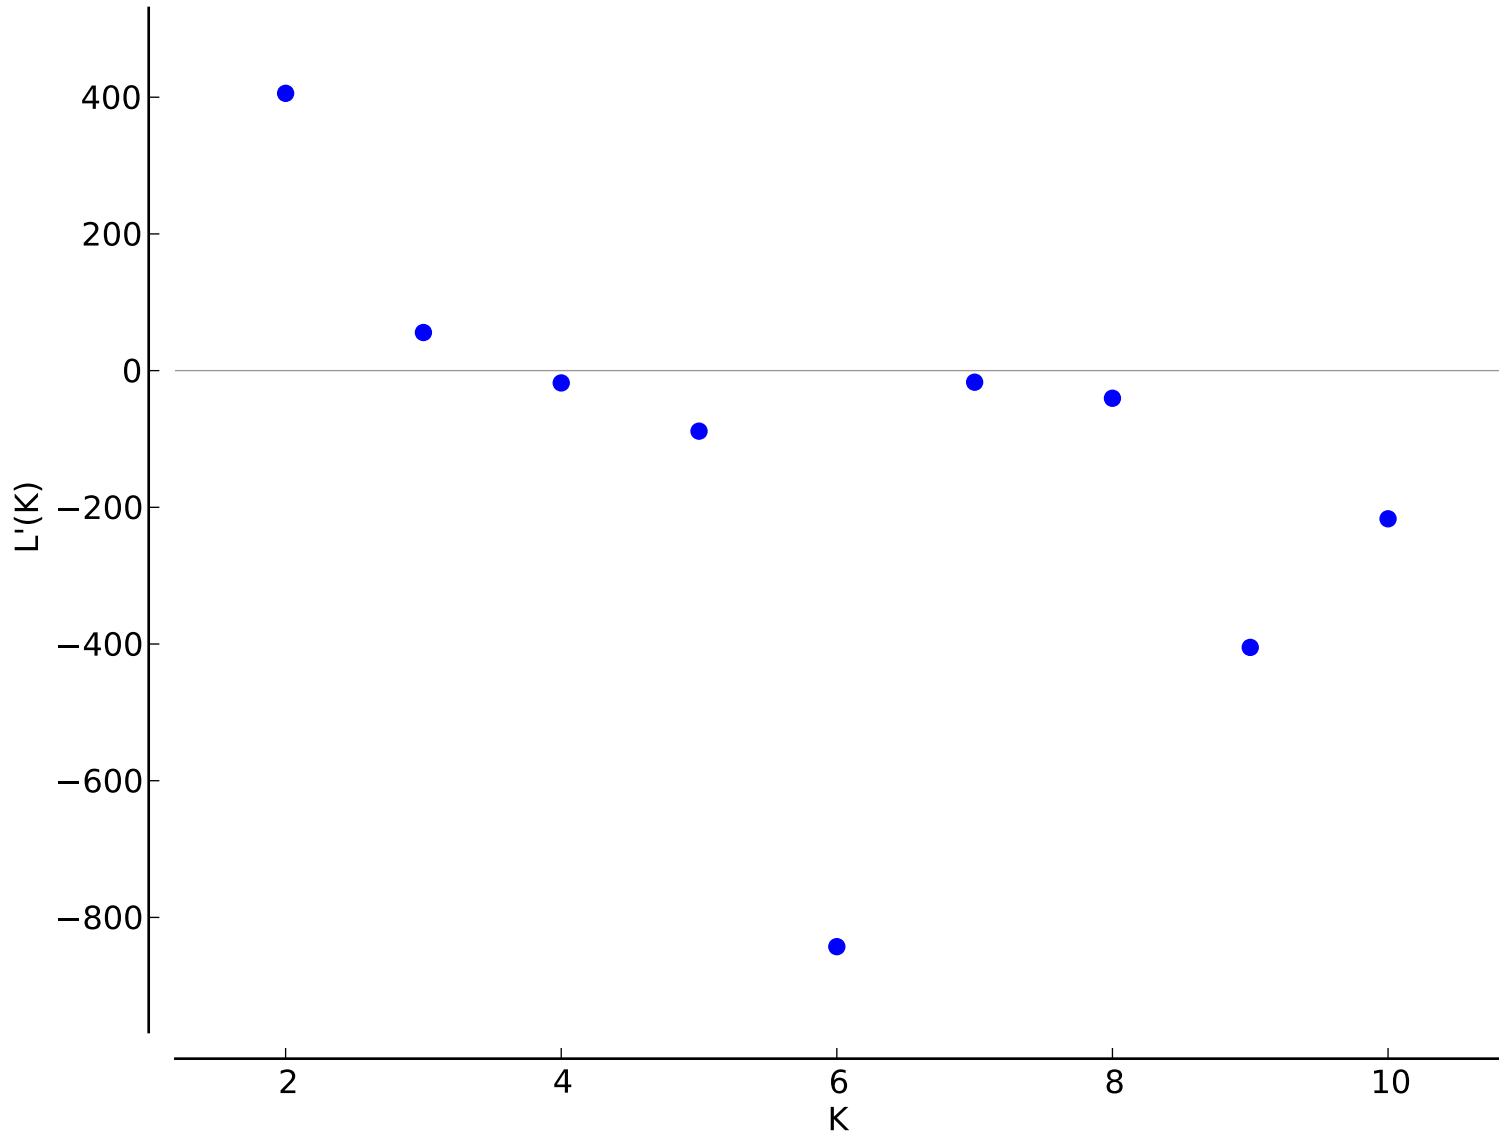

Absolute value of the 2nd order rate of change of the likelihood distribution (mean)

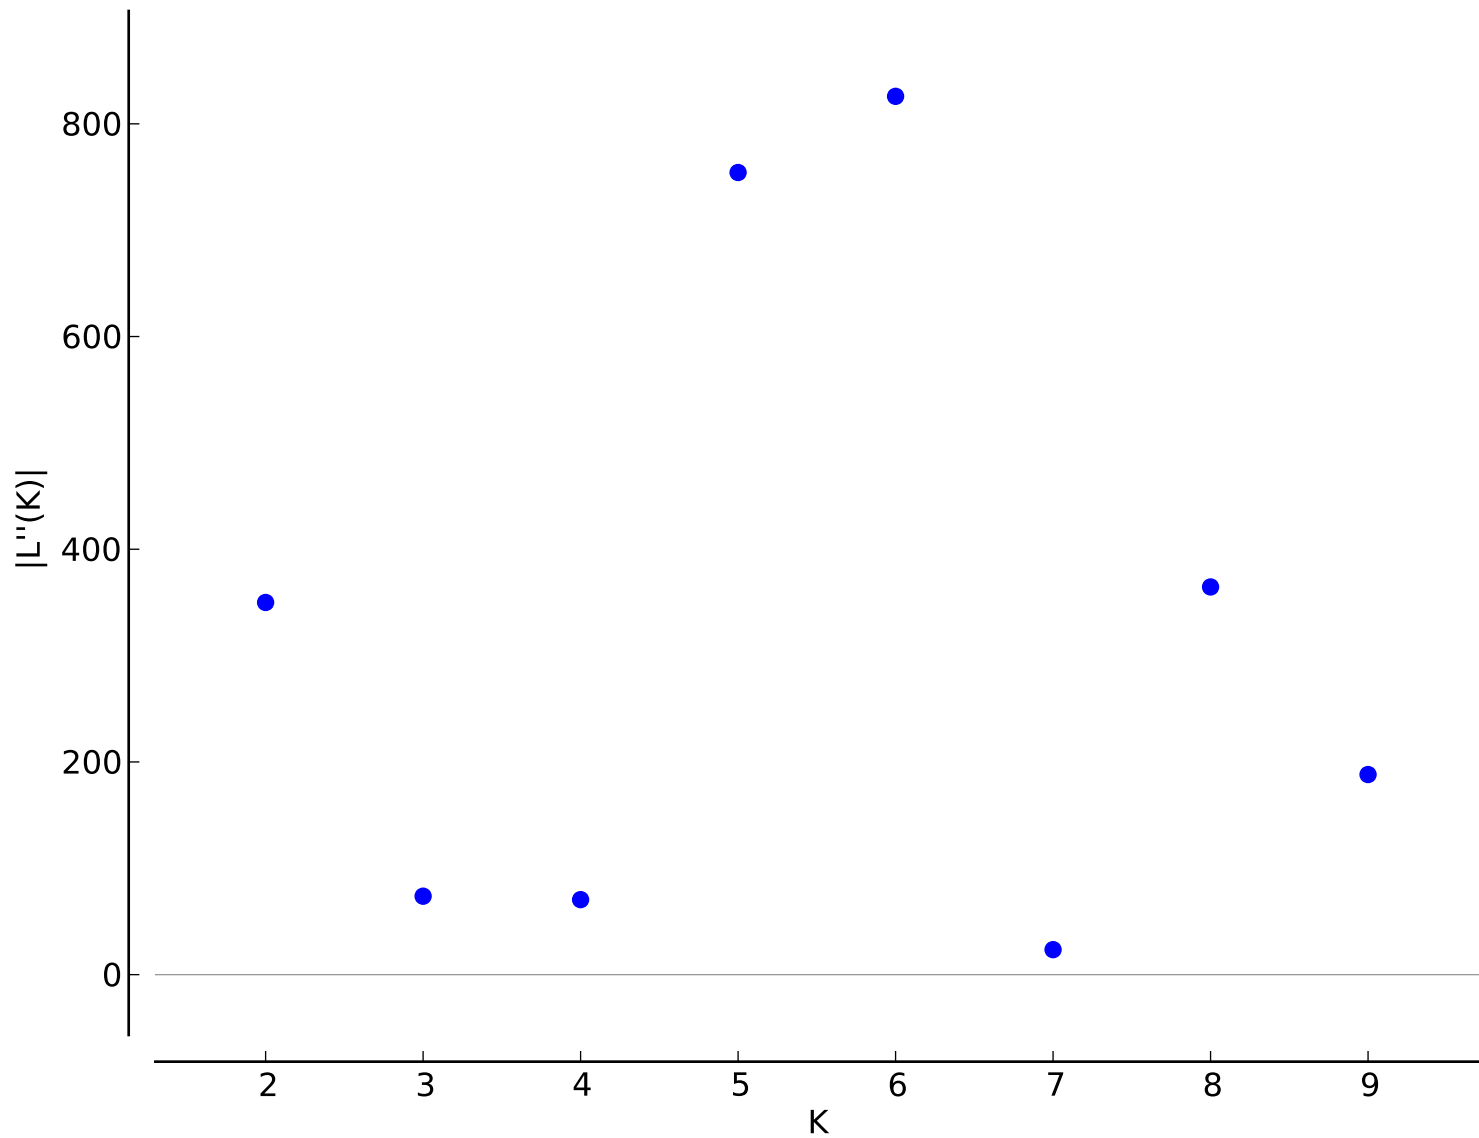

$$\text{DeltaK} = \text{mean}(|L''(K)|) / \text{sd}(L(K))$$

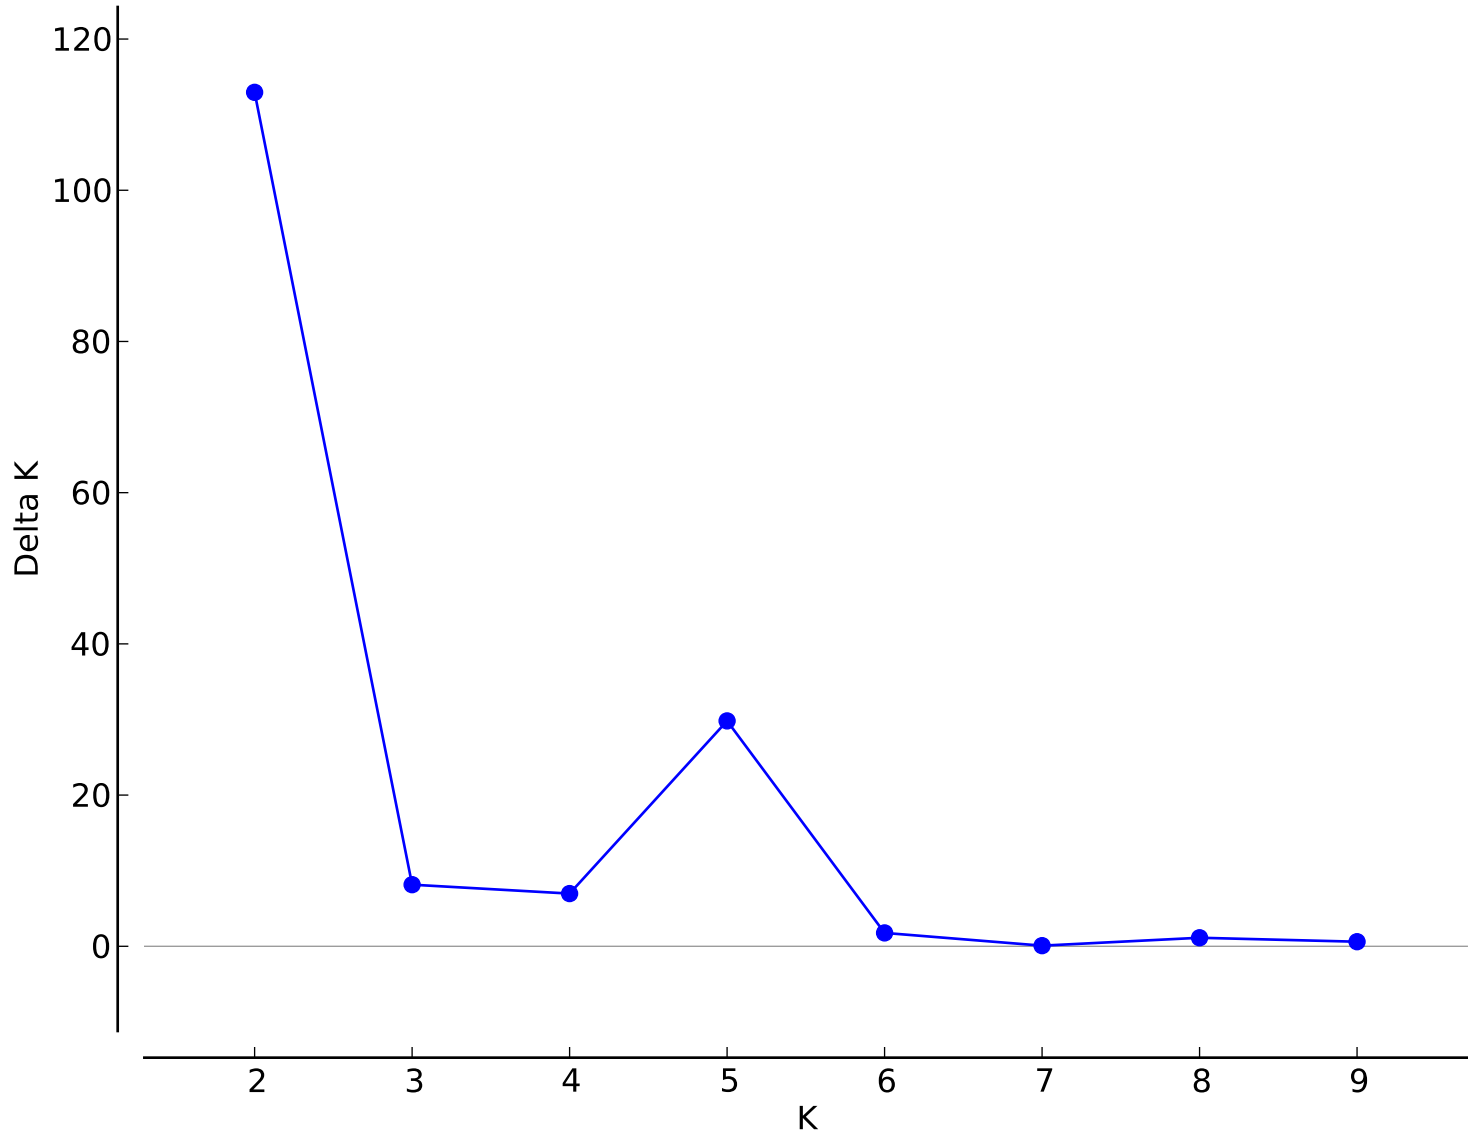

Evanno table

| # K | Reps | Mean LnP(K) | Stdev LnP(K) | Ln'(K)  | Ln''(K) | Delta K    |
|-----|------|-------------|--------------|---------|---------|------------|
| 1   | 10   | -11633.83   | 0.116        | NA      | NA      | NA         |
| 2   | 10   | -11228.15   | 3.0981       | 405.68  | 349.94  | 112.952455 |
| 3   | 10   | -11172.41   | 9.0527       | 55.74   | 73.77   | 8.148914   |
| 4   | 10   | -11190.44   | 10.1167      | -18.03  | 70.53   | 6.971658   |
| 5   | 10   | -11279      | 25.3007      | -88.56  | 754.23  | 29.81066   |
| 6   | 10   | -12121.79   | 466.7155     | -842.79 | 825.85  | 1.769493   |
| 7   | 10   | -12138.73   | 282.7365     | -16.94  | 23.49   | 0.083081   |
| 8   | 10   | -12179.16   | 323.0629     | -40.43  | 364.53  | 1.128356   |
| 9   | 10   | -12584.12   | 310.5894     | -404.96 | 188.15  | 0.605784   |
| 10  | 10   | -12800.93   | 403.1152     | -216.81 | NA      | NA         |



Evanno table

| # K | Reps | Mean LnP(K) | Stdev LnP(K) | Ln'(K)  | Ln''(K) | Delta K    |
|-----|------|-------------|--------------|---------|---------|------------|
| 1   | 10   | -11633.83   | 0.116        | NA      | NA      | NA         |
| 2   | 10   | -11228.15   | 3.0981       | 405.68  | 349.94  | 112.952455 |
| 3   | 10   | -11172.41   | 9.0527       | 55.74   | 73.77   | 8.148914   |
| 4   | 10   | -11190.44   | 10.1167      | -18.03  | 70.53   | 6.971658   |
| 5   | 10   | -11279      | 25.3007      | -88.56  | 754.23  | 29.81066   |
| 6   | 10   | -12121.79   | 466.7155     | -842.79 | 825.85  | 1.769493   |
| 7   | 10   | -12138.73   | 282.7365     | -16.94  | 23.49   | 0.083081   |
| 8   | 10   | -12179.16   | 323.0629     | -40.43  | 364.53  | 1.128356   |
| 9   | 10   | -12584.12   | 310.5894     | -404.96 | 188.15  | 0.605784   |
| 10  | 10   | -12800.93   | 403.1152     | -216.81 | NA      | NA         |

S3 Figure. The mean ( $\bar{q}$ ) and 95% confidence interval of  $q$  values for each coastal killifish population as calculated for  $k=2$ , and each population's distance from Georgia (x-axis) as in Table 1.

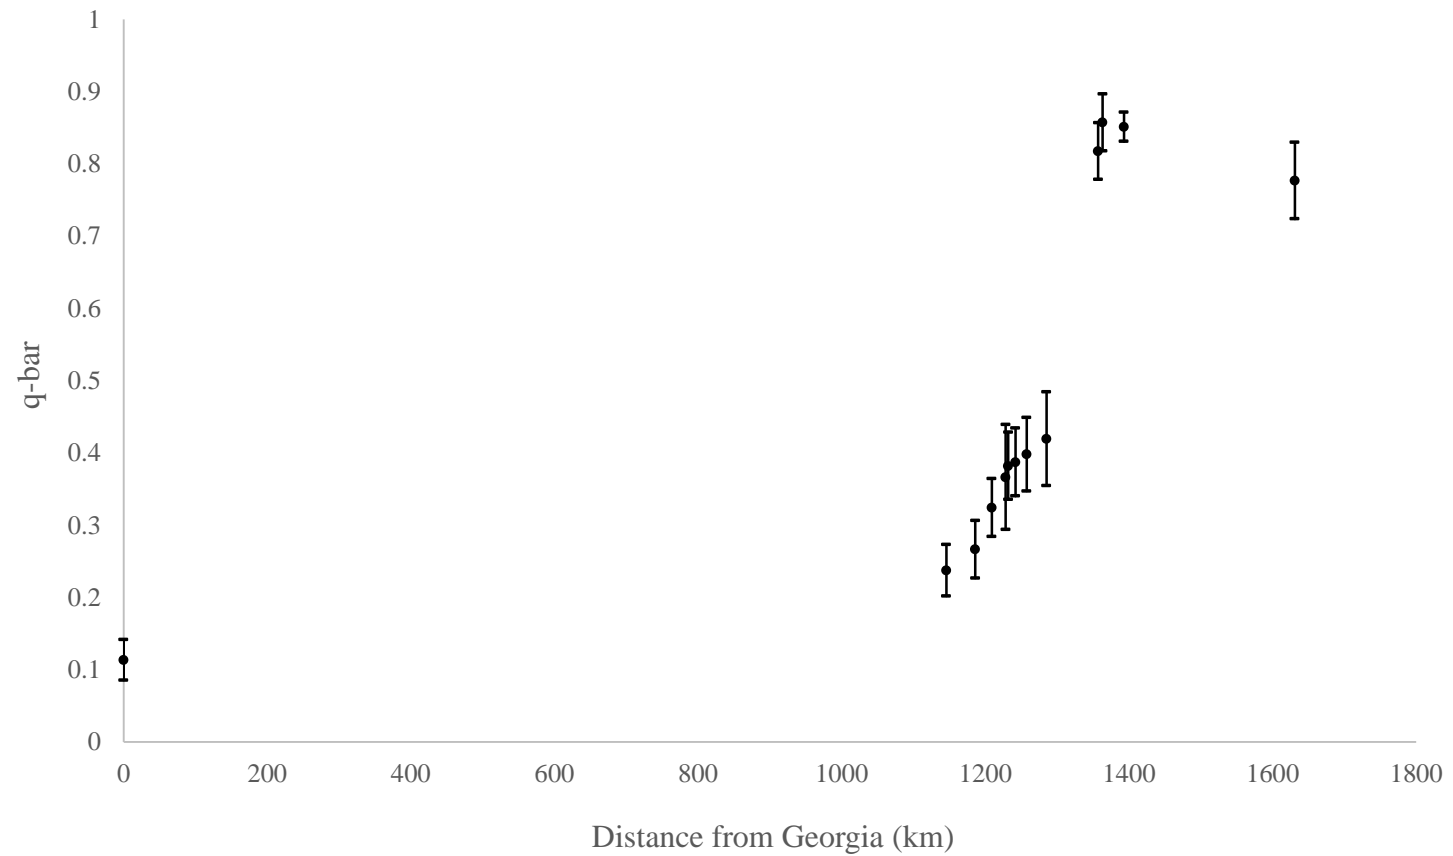

S4 Figure. *Cfit7* best fit clines as estimated using the frequency of the most common allele in the northernmost sampling location for each locus in this study: A) FhATG6, B) FhATGB101, C) mtDNA, D) FhATG18, E) FhATG20, F) FhATG4, G) FhATG2, H) FhATGB128, I) FhCA-1, J) FhATG17. Red squares represent the cline centres and blue triangles delimit the widths of the clines.

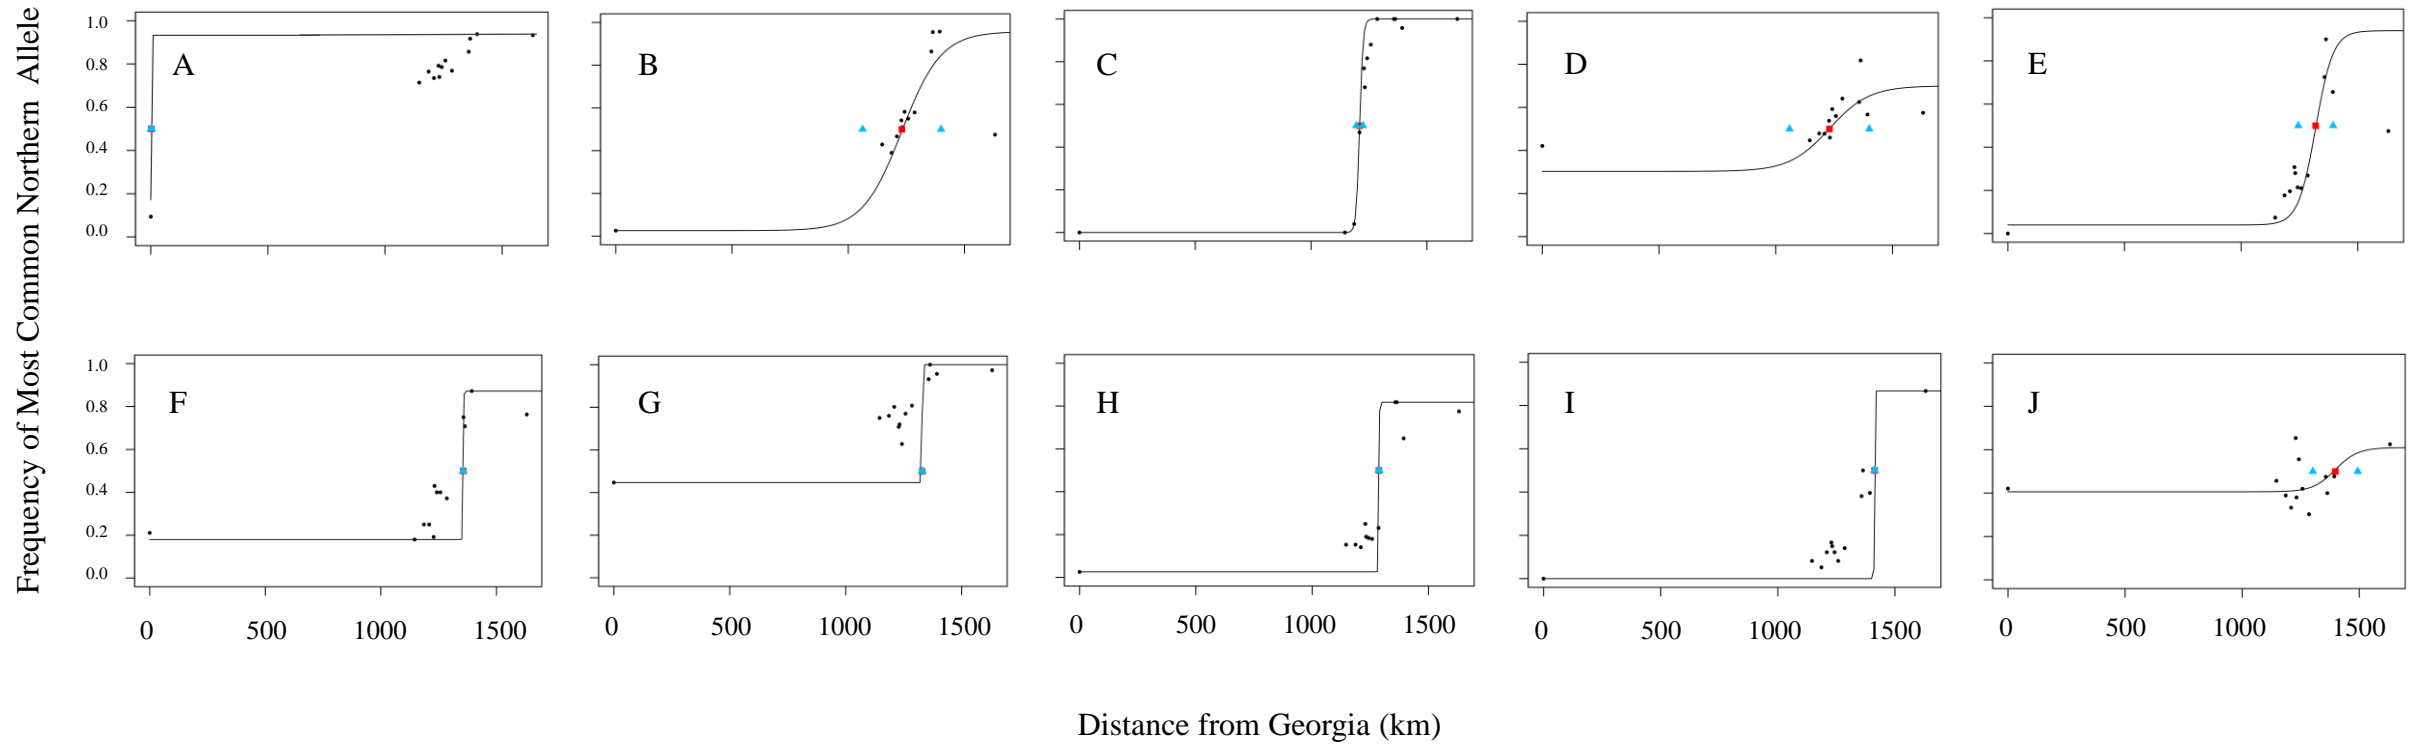

S5 Figure. Frequency distributions in hybrid index for individuals from Metedeconk Creek as calculated using various populations from within and proximate to the killifish hybrid zone as parental references. “Southern” parental populations are indicated with red font, while “northern” parental populations are indicated with blue font. Individuals with a hybrid index approaching 0 are genetically more similar to the “southern” parent population, while those with a hybrid index approaching 1 identify more closely with the “northern” parent population.

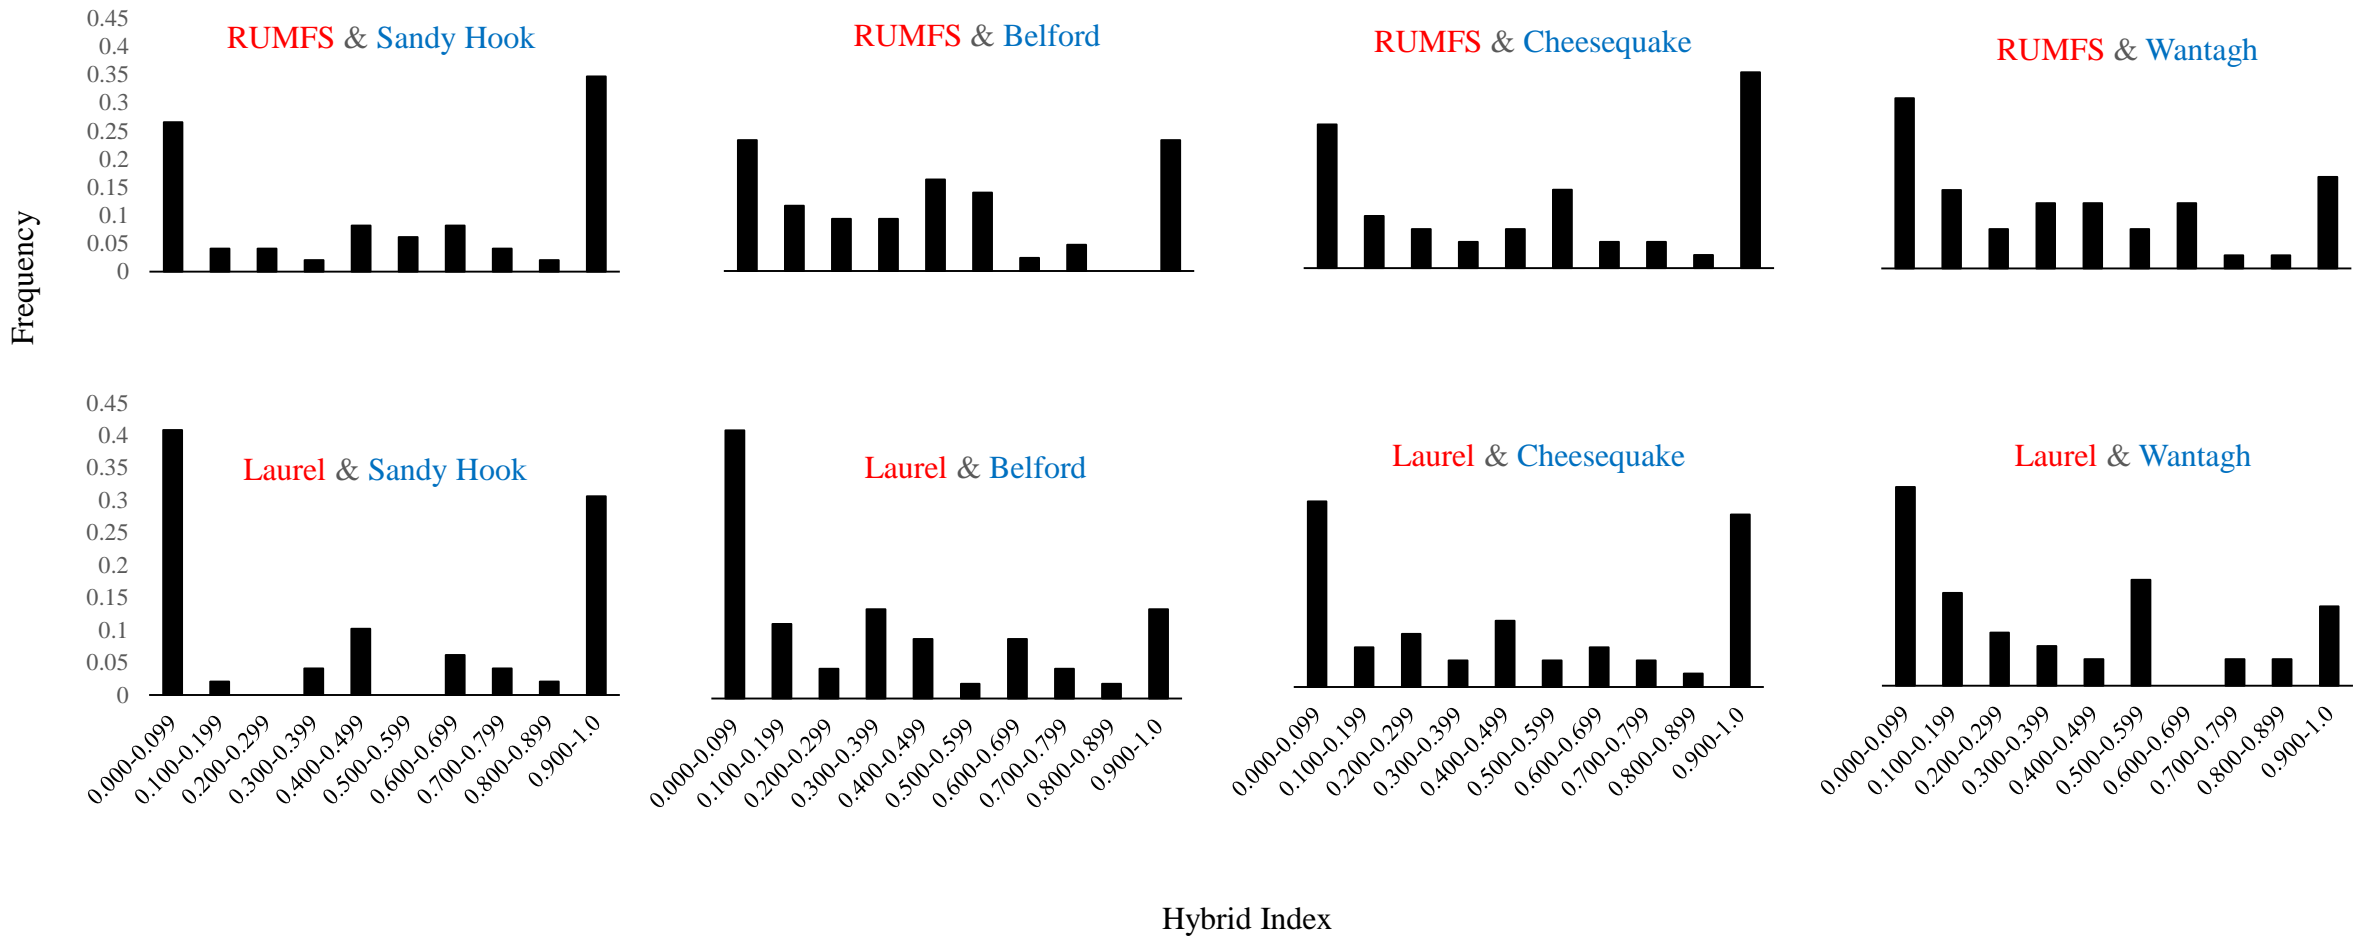

**S1 Table. PCR conditions for microsatellite loci.** Values are temperature and duration, respectively. Each reaction began with initial denaturation of 95°C for 2 minutes and ended with a final extension of 72°C for 5 minutes.

| Locus                            | Denaturation 1 | Annealing 1 | Extension 1 | Denaturation 2 | Annealing 2 | Extension 2 |
|----------------------------------|----------------|-------------|-------------|----------------|-------------|-------------|
| FhCA-1                           | 94°, 30s       | 52°, 45s    | 72°, 1 min  | 94°, 30        | 56°, 45s    | 72°, 1 min  |
| FhATG-6                          | 94°, 30s       | 63°, 45s    | 72°, 1 min  | NA             | NA          | NA          |
| FhATG-2                          | 94°, 30s       | 58°, 45s    | 72°, 1 min  | NA             | NA          | NA          |
| FhATG-4 FhATG-B101<br>FhATG-B128 |                |             |             |                |             |             |
| FhATG-17                         | 94°, 30s       | 54°, 45s    | 72°, 1 min  | 94°, 30s       | 59°, 45s    | 72°, 1 min  |
| FhATG-18                         |                |             |             |                |             |             |
| FhATG-20                         |                |             |             |                |             |             |

**S3 Table. Frequency of the northern mtDNA genotype and the most common northern allele for each microsatellite in *F. heteroclitus*.** Location numbers correspond to those given in Table 1. Distance from Georgia is calculated as the straight line distance along the coastline. The total number of alleles at each locus and at each location are given in parentheses.

| Location | Distance from Georgia (km) | mtDNA <sup>N</sup> | FhATG18 (7) | FhATG20 (12) | FhATG17 (6) | FhATG B101 (14) | FhATG B128 (16) | FhATG2 (8) | FhATG4 (17) | FhATG6 (7) | FhCA-1 (27) |
|----------|----------------------------|--------------------|-------------|--------------|-------------|-----------------|-----------------|------------|-------------|------------|-------------|
| 1.       | 0                          | 0.000              | 0.421 (6)   | 0 (8)        | 0.421 (4)   | 0.026 (8)       | 0.026 (7)       | 0.447 (6)  | 0.211 (7)   | 0.094 (6)  | 0 (15)      |
| 2.       | 1145.77                    | 0.000              | 0.420 (6)   | 0.070 (7)    | 0.430 (2)   | 0.420 (10)      | 0.150 (8)       | 0.750 (5)  | 0.180 (10)  | 0.714 (4)  | 0.082 (14)  |
| 3.       | 1186.03                    | 0.040              | 0.450 (5)   | 0.170 (7)    | 0.350 (2)   | 0.390 (12)      | 0.150 (9)       | 0.760 (5)  | 0.250 (14)  | 0.765 (5)  | 0.052 (18)  |
| 4.       | 1208.94                    | 0.469              | 0.449 (8)   | 0.176 (9)    | 0.294 (6)   | 0.427 (13)      | 0.136 (9)       | 0.741 (4)  | 0.268 (12)  | 0.735 (4)  | 0.122 (13)  |
| 5.       | 1228.41                    | 0.769              | 0.602 (5)   | 0.258 (8)    | 0.444 (3)   | 0.563 (11)      | 0.227 (11)      | 0.713 (3)  | 0.285 (8)   | 0.792 (3)  | 0.167 (10)  |
| 6.       | 1231.88                    | 0.680              | 0.460 (7)   | 0.280 (7)    | 0.380 (4)   | 0.510 (12)      | 0.190 (9)       | 0.720 (4)  | 0.430 (8)   | 0.740 (5)  | 0.150 (18)  |
| 7.       | 1242.06                    | 0.816              | 0.592 (5)   | 0.214 (9)    | 0.543 (3)   | 0.582 (10)      | 0.184 (9)       | 0.615 (5)  | 0.406 (9)   | 0.786 (4)  | 0.122 (13)  |
| 8.       | 1257.54                    | 0.880              | 0.555 (6)   | 0.233 (8)    | 0.438 (3)   | 0.556 (11)      | 0.169 (9)       | 0.753 (5)  | 0.432 (9)   | 0.816 (4)  | 0.082 (14)  |
| 9.       | 1285.31                    | 1.000              | 0.641 (5)   | 0.269 (9)    | 0.303 (3)   | 0.579 (9)       | 0.231 (8)       | 0.808 (2)  | 0.372 (11)  | 0.769 (4)  | 0.141 (14)  |
| 10.      | 1357.23                    | 1.000              | 0.625 (5)   | 0.725 (5)    | 0.475 (3)   | 0.864 (3)       | 0.818 (4)       | 0.932 (2)  | 0.750 (4)   | 0.857 (4)  | 0.381 (8)   |
| 11.      | 1363.41                    | 1.000              | 0.818 (3)   | 0.900 (3)    | 0.400 (3)   | 0.955 (2)       | 0.818 (2)       | 1.000 (1)  | 0.708 (5)   | 0.917 (3)  | 0.500 (5)   |
| 12.      | 1393.09                    | 0.958              | 0.548 (7)   | 0.639 (5)    | 0.541 (5)   | 0.962 (3)       | 0.652 (4)       | 0.970 (3)  | 0.873 (5)   | 0.938 (6)  | 0.396 (7)   |
| 13.      | 1631                       | 1.000              | 0.575 (6)   | 0.475 (4)    | 0.625 (3)   | 0.475 (7)       | 0.775 (4)       | 0.974 (2)  | 0.763 (3)   | 0.933 (3)  | 0.867 (3)   |

**S4 Table.** Parameters for mitochondrial and microsatellite allele frequency clines as estimated with *Cfit*.

| Locus Name | Centre (km) | Slope  | Width (km) |
|------------|-------------|--------|------------|
| FhATG6     | 0.230       | 9.8745 | 4.05       |
| FhATGB101  | 1230.45     | 0.1185 | 337.55     |
| mtDNA      | 1209.53     | 1.3600 | 29.41      |
| FhATG18    | 1229.88     | 0.1172 | 341.30     |
| FhATG20    | 1319.40     | 0.2679 | 149.31     |
| FhATG4     | 1356.13     | 9.9985 | 4.00       |
| FhATG2     | 1329.58     | 10.000 | 4.00       |
| FhATGB128  | 1286.66     | 8.9057 | 4.49       |
| FhCA-1     | 1412.96     | 9.9999 | 4.00       |
| FhATG17    | 1397.45     | 0.2088 | 191.57     |
